# Supplementary material for: Biomass screening for syngas production by flash photopyrolysis
Source: Royal Society of Chemistry journal article supplement (doi:10.1039/d4ra01845a), 2024-01-01
Supplement: d4ra01845a1.pdf [file d4ra01845a1.pdf]

## Supplementary information

# Biomass screening for syngas production by flash photopyrolysis

**Abderrahman Mellalou,<sup>a</sup> Wanderson O. Silva,<sup>b</sup> Mathieu Soutrenon,<sup>b</sup> and Hubert H. Girault<sup>c</sup>,  
Abdelkader Outzourhit,<sup>d</sup> Jones Alami,<sup>a</sup> Fouad Ghamouss,<sup>a\*</sup>**

*<sup>a</sup>Materials Science Energy and Nanoengineering Department, Mohamed VI Polytechnic University, Benguerir, Morocco.*

*<sup>b</sup>Institute of Systems Engineering, HES-SO Valais- Wallis, CH-1950 Sion, Switzerland*

*<sup>c</sup>Institut des Sciences et Ingénierie Chimiques (ISIC), École Polytechnique Fédérale de Lausanne (EPFL) Station 6, CH-1015 Lausanne, Switzerland.*

*<sup>d</sup>Laboratory of Materials, Energy and Environment, Cadi Ayyad University, Faculty Of Sciences Semlalia.*

Corresponding author.

*E-mail address:* fouad.ghamouss@um6p.ma

1. **Moisture determination.** The weighted samples in crucibles without the covers are heated with a heating rate (15–50 C/min) from room temperature to 105 °C, followed by a 105 °C isothermal hold for 3 min under inert atmosphere (nitrogen, argon or helium). The moisture content is calculated by the following formula:

$$Mo = \frac{(W - B)}{W}$$

where  $W$  is the mass of the sample used,  $B$  is the mass of the sample after drying in moisture test.

2. **Volatile matter determination.** Then a heating ramp (50– 100 C/min) is programmed until 950 °C, and a cooling process starts with a cooling rate (–50 to –100 C/min) until 450 °C. The volatile matter content is calculated by the following formula:

$$VM = \frac{(B - C)}{W}$$

where  $C$  is the mass of the sample after heating in volatile matter test.

3. **Ash determination.** The flow gas is changed to oxidizing gas (oxygen or air), then a heating ramp begins until 800 °C, followed by an 800 °C isothermal hold for 3 min. The ash content is calculated by the following formula:

$$A = \frac{D}{W}$$

where  $D$  is the mass of the residue remaining after the ash test.

4. **Fixed carbon determination.** The fixed carbon content is calculated according to the following equation:

$$FC = 1 - M - VM - A$$

**Figure S1** - (a) Scheme of the photo-pyrolysis system with heat resistant table (inset 1) and Xenon flash lamp (inset 2) and (b) power supply (PulseForge 1300 photonic curing system, Novacentrix, USA).

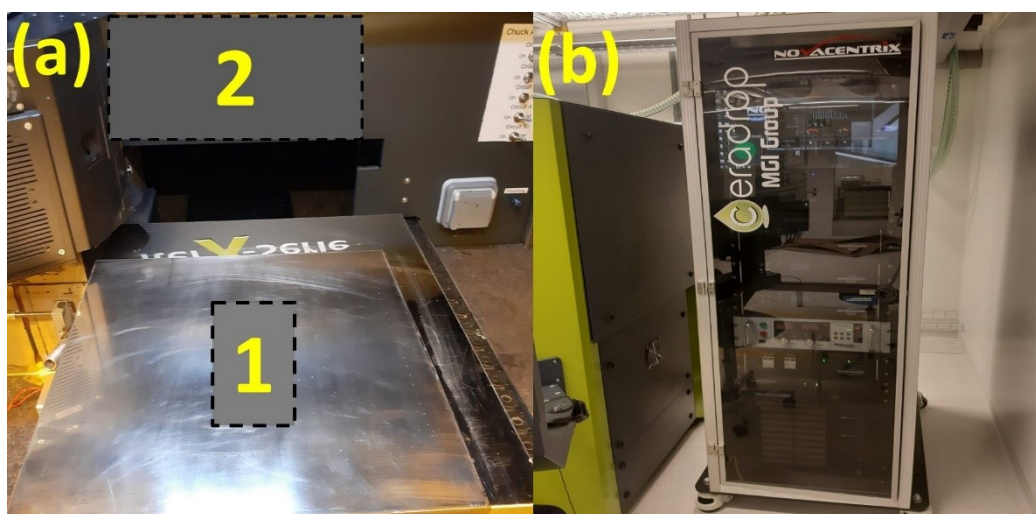

### Flash photopyrolysis main reactions

Biomass + flash irradiation (flash pyrolysis)  $\leftrightarrow$  C + H<sub>2</sub> + CO + CH<sub>4</sub> + C<sub>2</sub>H<sub>4</sub> + CH<sub>3</sub>CHO + H<sub>2</sub> + Tar + Char

Tar + flash irradiation (flash pyrolysis)  $\leftrightarrow$  H<sub>2</sub> + CO + CH<sub>4</sub> + CO<sub>2</sub> + C<sub>2</sub>H<sub>4</sub> + CH<sub>3</sub>CHO + Char

C + H<sub>2</sub>O  $\leftrightarrow$  CO + H<sub>2</sub> (primary carbon-steam reaction)

2C + O<sub>2</sub>  $\leftrightarrow$  2CO (Partial oxidation)

C + O<sub>2</sub>  $\leftrightarrow$  2CO (Boudouar reaction)

C + O<sub>2</sub>  $\leftrightarrow$  CO<sub>2</sub> (Carbon oxidation)

CH<sub>4</sub> + CO<sub>2</sub>  $\leftrightarrow$  2CO + 2H<sub>2</sub> (Dry reforming)

CH<sub>4</sub> + H<sub>2</sub>O  $\leftrightarrow$  CO + 3H<sub>2</sub> (Steam reforming)

C + 2H<sub>2</sub>  $\leftrightarrow$  CH<sub>4</sub> (Hydrogasification reaction)

CO + 3H<sub>2</sub>  $\leftrightarrow$  CH<sub>4</sub> + H<sub>2</sub>O (Methanation)
